# Supplementary material
Source: publisher figshare collection journal article supplement (https://frontiersin.figshare.com/ndownloader/files/14395244)
Supplement: Supplementary file [file 14395244]

***Supplementary Figure S1: The yeast expression by antibiotic screening of RGP colonies***

**Article Title:**

**“Aquaculture breeding enhancement: Maturation and spawning in sea cucumbers using a recombinant relaxin-like gonad-stimulating peptide”**

***Authors:***

Hoang Dinh Chieu<sup>1,2</sup>, Luke Turner<sup>3</sup>, Meaghan K. Smith<sup>1</sup>, Tianfang Wang<sup>1</sup>, Josephine Nocillado<sup>1</sup>, Peter Palma<sup>1,4</sup>, Saowaros Suwansa-ard<sup>1</sup>, Abigail Elizur<sup>1</sup>, and Scott F. Cummins<sup>1,\*</sup>.

***Institutional affiliation:***

<sup>1</sup> Genecology Research Centre, University of the Sunshine Coast, 90 Sippy Downs Drive, Sippy Downs, Queensland 4556, Australia;

<sup>2</sup> Research Institute for Marine Fisheries (RIMF), 224 LeLai Street, HaiPhong City, Vietnam;

<sup>3</sup> Tasmanian Seafoods Pty. Ltd., Tasmania, Australia;

<sup>4</sup> Aquaculture Department, Southeast Asian Fisheries Development Center, Tigbauan, Iloilo 5021, Philippines.

***Address correspondence to:***

\* Assoc. Prof. Scott F. Cummins. Genecology Research Centre, Faculty of Science, Health, Education and Engineering, University of the Sunshine Coast, Australia. Tel: +61 7 5456 5501; Fax: +61 7 5456 5010; email: [scummins@usc.edu.au](mailto:scummins@usc.edu.au)

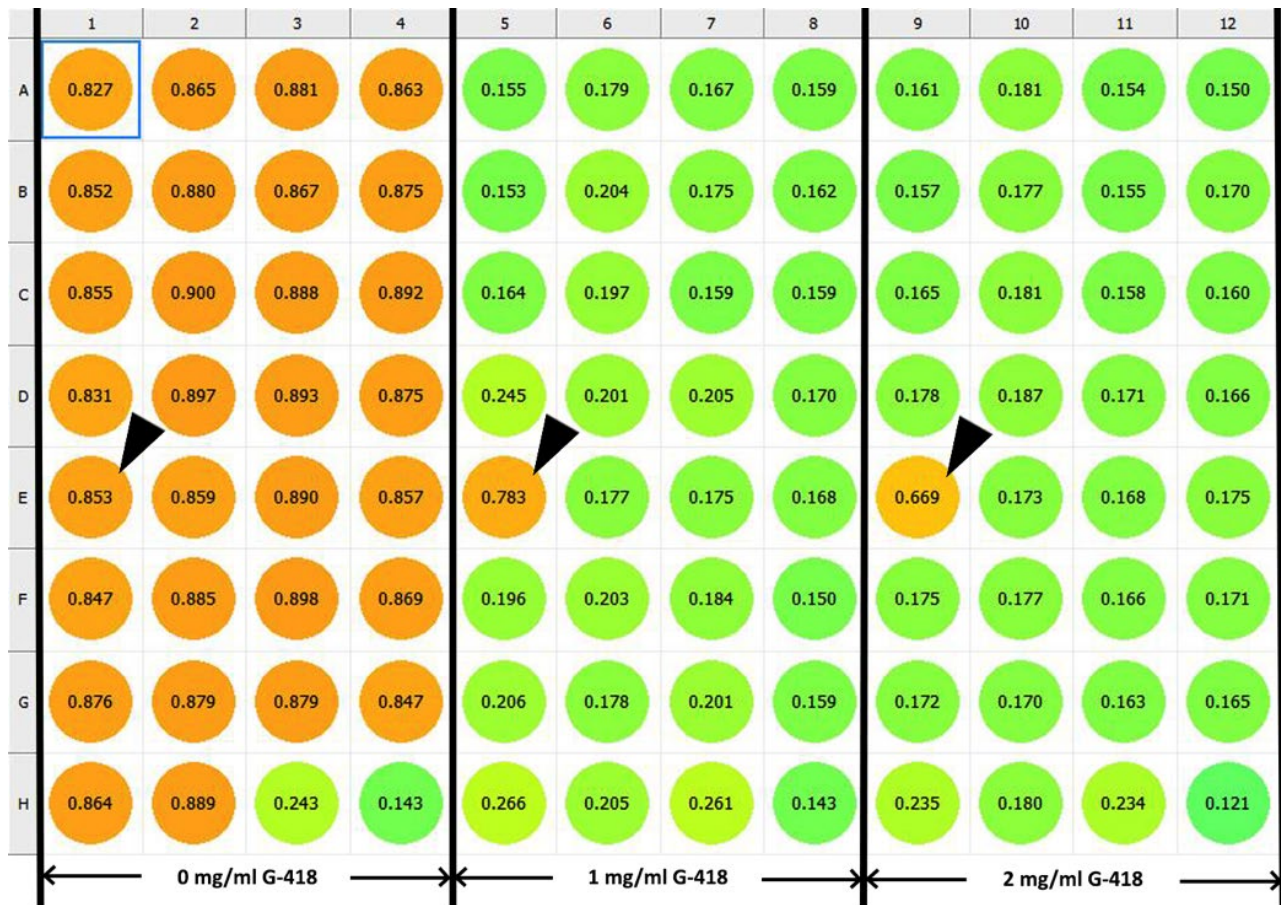

**Figure S1.** The expression of RGP colonies in a 96-well culture plate based on the highest OD<sub>600</sub> value in the geneticin concentrations of 1 and 2 mg/mL G-418 antibiotic. Column 1 – 4, 5 – 8, 9 – 12 indicate yeast colonies grown in YPD solution with 0 mg/mL, 1 mg/mL and 2 mg/mL G418, respectively. Arrowheads indicate the wells (E1, E5, E9) containing recombinant RGP. The wells H3, H4, H7, H8, H11 and H12 indicate control group with only YPD solution.
